# Supplementary material for: Loss of nitrogen via anaerobic ammonium oxidation (anammox) in the California Current system during the late Quaternary
Source: Copernicus journal article supplement (doi:10.5194/bg-21-1517-2024), 2024-03-22
Supplement: Supplementary file 1 [file bg-21-1517-2024-supplement.zip]

Archive with 3 entries (3 files):
- bg-21-1517-2024-supplement-title-page.pdf
- Supplement 2.pdf
- Supplement 1.xlsx
