# Supplementary material for: Loss of nitrogen via anaerobic ammonium oxidation (anammox) in the California Current system during the late Quaternary
Source: Copernicus journal article supplement (doi:10.5194/bg-21-1517-2024), 2024-03-22
Supplement: Supplementary file 1 [file bg-21-1517-2024-supplement.zip › bg-21-1517-2024-supplement-title-page.pdf]

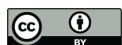

## *Supplement of*

# **Loss of nitrogen via anaerobic ammonium oxidation (anammox) in the California Current system during the late Quaternary**

**Zoë Rebecca van Kemenade et al.**

*Correspondence to:* Zoë Rebecca van Kemenade ([zoe.van.kemenade@nioz.nl](mailto:zoe.van.kemenade@nioz.nl))

- [bg-21-1517-2024-supplement-title-page.pdf](#)
- [Supplement 1.xlsx](#)
- [Supplement 2.pdf](#)

The copyright of individual parts of the supplement might differ from the article licence.
