# Supplementary material for: Loss of nitrogen via anaerobic ammonium oxidation (anammox) in the California Current system during the late Quaternary
Source: Copernicus journal article supplement (doi:10.5194/bg-21-1517-2024), 2024-03-22
Supplement: Supplementary file 1 [file bg-21-1517-2024-supplement.zip › Supplement 1.xlsx]

## Sheet: Table S1
sample name	Exp	Site	Hole	Core	Type	Sec	Top (cm)	Bottom (cm)	Depth (mcd)	Vol (cc)	Tuned depth (mcd)	Age tuned (cal ka BP)	d15N (corr.)	Sedimentation rate (cm/kyr)
1012C1H1_25	167	1012	C	1	H	1	25	28	0.25	20	0.25	7	9.20318	3.57143
1012C1H1_45	167	1012	C	1	H	1	45	48	0.55	20	0.55	8.3	9.13218	6.62651
1012C1H1_60	167	1012	C	1	H	1	60	63	0.85	20	0.85	9.33	9.98818	9.1104
1012C1H1_70	167	1012	C	1	H	1	70	73	0.95	20	0.95	9.6	10.0082	9.89583
1012C1H1_115	167	1012	C	1	H	1	115	118	1	20	1	9.8	9.68718	10.2041
1012C1H2_15	167	1012	C	1	H	2	15	18	1.65	20	2.4	16.85	5.91518	14.2433
1012C1H2_65	167	1012	C	1	H	2	65	68	2.15	20	3	20.66	5.91018	14.5208
1012C1H2_115	167	1012	C	1	H	2	115	118	2.25	20	3.14	21	6.45318	14.9524
1012C1H2_135	167	1012	C	1	H	2	135	138	2.35	20	3.26	21.76	8.52518	14.9816
1012C1H3_5	167	1012	C	1	H	3	5	8	2.75	20	3.75	25.4	7.23318	14.7638
1012C1H3_25	167	1012	C	1	H	3	25	28	3.15	20	4.07	29.4	7.72818	13.8435
1012C1H3_55	167	1012	C	1	H	3	55	58	3.35	20	4.23	32.1	7.24118	13.1776
1012C1H3_75	167	1012	C	1	H	3	75	78	3.45	20	4.31	33	6.94518	13.0606
1012C1H3_105	167	1012	C	1	H	3	105	108	3.55	20	4.39	33.55	6.25818	13.0849
1012C1H3_135	167	1012	C	1	H	3	135	138	3.65	20	4.47	34.84	6.00418	12.8301
1012C1H4_15	167	1012	C	1	H	4	15	18	4	20	4.76	38.83	8.09618	12.2586
1012C1H4_40	167	1012	C	1	H	4	40	43	4.25	20	4.96	41.44	7.70518	11.9691
1012C1H4_55	167	1012	C	1	H	4	55	58	4.65	20	5.3	44.5	8.39618	11.9101
1012C1H4_65	167	1012	C	1	H	4	65	68	4.75	20	5.4	46.6	8.42118	11.588
1012C1H4_80	167	1012	C	1	H	4	80	83	4.95	20	5.6	48	7.82318	11.6667
1012C1H4_95	167	1012	C	1	H	4	95	98	5.05	20	5.7	48.8	7.59818	11.6803
1012C1H4_110	167	1012	C	1	H	4	110	113	5.15	20	5.8	49.7	7.26418	11.67
1012C1H4_125	167	1012	C	1	H	4	125	128	5.25	20	5.9	50.7		11.6371
1012C1H4_140	167	1012	C	1	H	4	140	143	5.3	20	5.95	50.8	7.40418	11.7126
1012C1H5_5	167	1012	C	1	H	5	5	8	5.4	20	6	51.7	8.24418	11.6054
1012C1H5_20	167	1012	C	1	H	5	20	23	5.5	20	6.1	53.3	7.75118	11.4447
1012A2H1_73	167	1012	A	2	H	1	73	76	6	20	6.8	63.1	6.01718	10.7765
1012A2H1_83	167	1012	A	2	H	1	83	86	6.2	20	7.02	64.8	5.74918	10.8333
1012A2H1_98	167	1012	A	2	H	1	98	101	6.45	20	7.3	68.9	6.22218	10.5951
1012A2H1_113	167	1012	A	2	H	1	113	116	6.55	20	7.42	70.7	6.49618	10.495
1012C2H1_15	167	1012	C	2	H	1	15	18	7.35	20	7.9	75	8.18018	10.5333
1012C2H1_35	167	1012	C	2	H	1	35	38	7.55	20	8.07	76	8.34018	10.6184
1012C2H1_55	167	1012	C	2	H	1	55	58	7.7	20	8.19	78.2	7.87418	10.4731
1012C2H1_75	167	1012	C	2	H	1	75	78	7.85	20	8.32	81	7.47718	10.2716
1012C2H1_90	167	1012	C	2	H	1	90	93	8.05	20	8.5	85.2	7.12618	9.97653
1012C2H1_105	167	1012	C	2	H	1	105	108	8.2	20	8.65	86.4	7.22618	10.0116
1012C2H1_125	167	1012	C	2	H	1	125	128	8.4	20	8.85	88.6	6.36818	9.98871
1012C2H1_140	167	1012	C	2	H	1	140	143	8.6	20	9.05	90.2	5.77718	10.0333
1012C2H2_10	167	1012	C	2	H	2	10	13	8.75	20	9.15	91	7.46918	10.0549
1012C2H2_30	167	1012	C	2	H	2	30	33	8.85	20	9.25	92	7.11118	10.0543
1012C2H2_60	167	1012	C	2	H	2	60	63	8.95	20	9.35	92.6	7.04418	10.0972
1012C2H2_90	167	1012	C	2	H	2	90	93	9	20	9.3	93	6.97918	10
1012C2H2_110	167	1012	C	2	H	2	110	113	9.1	20	9.4	93.5	6.48418	10.0535
1012C2H2_130	167	1012	C	2	H	2	130	133	9.3	20	9.6	95	7.37118	10.1053
1012C2H3_10	167	1012	C	2	H	3	10	13	9.5	20	9.8	96.6	6.90318	10.1449
1012C2H3_30	167	1012	C	2	H	3	30	33	9.7	20	9.9	98.2	6.70618	10.0815
1012C2H3_45	167	1012	C	2	H	3	45	48	9.8	20	10	98.3	7.39118	10.1729
1012C2H3_60	167	1012	C	2	H	3	60	63	9.9	20	10.1	99.5	7.68118	10.1508
1012C2H3_80	167	1012	C	2	H	3	80	83	10.1	20	10.2	100.2	7.06618	10.1796
1012C2H3_100	167	1012	C	2	H	3	100	103	10.4	20	10.5	103.5	7.96618	10.1449
1012C2H3_120	167	1012	C	2	H	3	120	123	10.6	20	10.7	106.1	8.31318	10.0848
1012C2H3_140	167	1012	C	2	H	3	140	143	10.7	20	10.8	106.7	8.16018	10.1218
1012C2H4_20	167	1012	C	2	H	4	20	23	11	20	11	109.5	6.67718	10.0457
1012C2H4_40	167	1012	C	2	H	4	40	43	11.2	20	11.2	111.95	6.48118	10.0045
1012C2H4_60	167	1012	C	2	H	4	60	63	11.7	20	11.7	116.5	8.36618	10.0429
1012C2H4_80	167	1012	C	2	H	4	80	83	12.2	20	12	120.4	9.15917	9.96678
1012C2H4_100	167	1012	C	2	H	4	100	103	12.3	20	12.1	121.7	8.55417	9.94248
1012C2H4_120	167	1012	C	2	H	4	120	123	12.4	20	12.2	123.1	8.42517	9.91064
1012C2H4_140	167	1012	C	2	H	4	140	143	12.6	20	12.36	124.5	7.57717	9.92771
1012C2H5_10	167	1012	C	2	H	5	10	13	12.7	20	12.44	125.8	7.07317	9.88871
1012C2H5_25	167	1012	C	2	H	5	25	28	12.8	20	12.5	127	6.96317	9.84252
1012C2H5_35	167	1012	C	2	H	5	35	38	12.9	20	12.6	128.21	6.71517	9.82763
1012C2H5_50	167	1012	C	2	H	5	50	53	13	20	12.7	129.3	6.19117	9.82212
1012C2H5_70	167	1012	C	2	H	5	70	73	13.2	20	12.86	131.95	6.27717	9.74612
1012C2H5_90	167	1012	C	2	H	5	90	93	13.4	20	13.03	134.5		9.68773
1012C2H5_120	167	1012	C	2	H	5	120	123	13.6	20	13.2	136.23	6.86617	9.6895
1012C2H5_140	167	1012	C	2	H	5	140	143	13.8	20	13.4	138.74	6.87717	9.65835
1012C2H6_20	167	1012	C	2	H	6	20	23	14.1	20	13.62	141.24	6.43517	9.64316
1012C2H6_40	167	1012	C	2	H	6	40	43	14.7	20	14.06	146.5	7.0616	9.59727
1012C2H6_60	167	1012	C	2	H	6	60	63	14.9	20	14.21	148.7	7.6576	9.55615
1012C2H6_70	167	1012	C	2	H	6	70	73	15	20	14.28	149.5	7.8396	9.55184
1012C2H6_80	167	1012	C	2	H	6	80	83	15.1	20	14.36	150.5	7.10717	9.54153
1012C2H6_95	167	1012	C	2	H	6	95	98	15.25	20	14.5	152.6	7.34217	9.50197
1012C2H6_110	167	1012	C	2	H	6	110	113	15.7	20	14.8	156.32	6.8076	9.46776
sample name	Exp	Site	Hole	Core	Type	Sec	Top (cm)	Bottom (cm)	Depth (mcd)	Vol (cc)	Depth (mcd) from Liu et al,, 2005	Age (cal ka BP) from Liu et al., 2005	d15N (corr.)	Sedimentation rate (cm/kyr)
1012C3H1_2	167	1012	C	3	H	1	2	5	16.81	20	16.82	186.81	x	9.0038
1012C3H1_133	167	1012	C	3	H	1	133	136	18.12	20	18.15	205.291	x	8.84111
1012C3H2_89	167	1012	C	3	H	2	89	92	19.18	20	19.15	220.26	x	8.69427
1012C3H3_89	167	1012	C	3	H	3	89	92	20.68	20	20.69	242.34	x	8.53759
1012C3H4_89	167	1012	C	3	H	4	89	92	22.68	20	22.69	265.61	x	8.5426
1012C3H5_99	167	1012	C	3	H	5	99	102	23.78	20	23.8	280.5	x	8.48485
1012C3H6_99	167	1012	C	3	H	6	99	102	25.28	20	25.28	301.46	x	8.38586
1012C3H7_39	167	1012	C	3	H	7	39	42	26.18	20	26.18	318.31	x	8.22469
1012C4H1_96	167	1012	C	4	H	1	96	99	27.58	20	27.58	339.21	x	8.13066
1012C4H2_126	167	1012	C	4	H	2	126	129	29.38	20	29.38	370.962	x	7.91994
1012C4H3_76	167	1012	C	4	H	3	76	79	30.38	20	30.38	386.58	x	7.85866
1012C4H4_16	167	1012	C	4	H	4	16	19	31.28	20	31.28	398.19	x	7.85555
1012C4H5_26	167	1012	C	4	H	5	26	29	32.88	20	32.88	420.51	x	7.81908
1012C4H6_26	167	1012	C	4	H	6	26	29	34.38	20	34.38	445.48	x	7.71752
1012C4H7_16	167	1012	C	4	H	7	16	19	35.78	20	35.78	467.82	x	7.64824
1012A5H1_121	167	1012	A	5	H	1	121	124	36.58	20	36.58	483.11	x	7.57177
1012C5H1_21	167	1012	C	5	H	1	21	24	37.48	20	37.48	496.1	x	7.55493

## Sheet: Table S2
Samples used for ladderane FAME analysis
sample name	Exp	Site	Hole	Core	Type	Sec	Top (cm)	Bottom (cm)	Depth (mcd)	Vol (cc)	Tuned age (cal ka BP)
1012C1H1_25	167	1012	C	1	H	1	25	28	0.25	20	7
1012C1H1_45	167	1012	C	1	H	1	45	48	0.55	20	8.3
1012C1H1_60	167	1012	C	1	H	1	60	63	0.85	20	9.33
1012C1H1_70	167	1012	C	1	H	1	70	73	0.95	20	9.6
1012C1H1_115	167	1012	C	1	H	1	115	118	1	20	9.8
1012C1H2_15	167	1012	C	1	H	2	15	18	1.65	20	16.85
1012C1H2_65	167	1012	C	1	H	2	65	68	2.15	20	20.66
1012C1H2_115	167	1012	C	1	H	2	115	118	2.25	20	21
1012C1H2_135	167	1012	C	1	H	2	135	138	2.35	20	21.76
1012C1H3_5	167	1012	C	1	H	3	5	8	2.75	20	25.4
1012C1H3_25	167	1012	C	1	H	3	25	28	3.15	20	29.4
1012C1H3_55	167	1012	C	1	H	3	55	58	3.35	20	32.1
1012C1H3_75	167	1012	C	1	H	3	75	78	3.45	20	33
1012C1H3_105	167	1012	C	1	H	3	105	108	3.55	20	33.55
1012C1H3_135	167	1012	C	1	H	3	135	138	3.65	20	34.84
1012C1H4_15	167	1012	C	1	H	4	15	18	4	20	38.83
1012C1H4_40	167	1012	C	1	H	4	40	43	4.25	20	41.44
1012C1H4_55	167	1012	C	1	H	4	55	58	4.65	20	44.5
1012C1H4_65	167	1012	C	1	H	4	65	68	4.75	20	46.6
1012C1H4_80	167	1012	C	1	H	4	80	83	4.95	20	48
1012C1H4_95	167	1012	C	1	H	4	95	98	5.05	20	48.8
1012C1H4_110	167	1012	C	1	H	4	110	113	5.15	20	49.7
1012C1H4_140	167	1012	C	1	H	4	140	143	5.3	20	50.8
1012C1H5_5	167	1012	C	1	H	5	5	8	5.4	20	51.7
1012A2H1_73	167	1012	A	2	H	1	73	76	6	20	63.1
1012A2H1_98	167	1012	A	2	H	1	98	101	6.45	20	68.9
1012A2H1_113	167	1012	A	2	H	1	113	116	6.55	20	70.7
1012C2H1_15	167	1012	C	2	H	1	15	18	7.35	20	75
1012C2H1_75	167	1012	C	2	H	1	75	78	7.85	20	81
1012C2H1_90	167	1012	C	2	H	1	90	93	8.05	20	85.2
1012C2H1_125	167	1012	C	2	H	1	125	128	8.4	20	88.6
1012C2H2_10	167	1012	C	2	H	2	10	13	8.75	20	91
1012C2H2_90	167	1012	C	2	H	2	90	93	9	20	93
1012C2H3_10	167	1012	C	2	H	3	10	13	9.5	20	96.6
1012C2H3_45	167	1012	C	2	H	3	45	48	9.8	20	98.3
1012C2H3_80	167	1012	C	2	H	3	80	83	10.1	20	100.2
1012C2H3_100	167	1012	C	2	H	3	100	103	10.4	20	103.5
1012C2H3_140	167	1012	C	2	H	3	140	143	10.7	20	106.7
1012C2H4_40	167	1012	C	2	H	4	40	43	11.2	20	111.95
1012C2H4_100	167	1012	C	2	H	4	100	103	12.3	20	121.7
1012C2H4_120	167	1012	C	2	H	4	120	123	12.4	20	123.1
1012C2H4_140	167	1012	C	2	H	4	140	143	12.6	20	124.5
1012C2H5_10	167	1012	C	2	H	5	10	13	12.7	20	125.8
1012C2H5_25	167	1012	C	2	H	5	25	28	12.8	20	127
1012C2H5_35	167	1012	C	2	H	5	35	38	12.9	20	128.21
1012C2H5_50	167	1012	C	2	H	5	50	53	13	20	129.3
1012C2H5_70	167	1012	C	2	H	5	70	73	13.2	20	131.95
1012C2H5_90	167	1012	C	2	H	5	90	93	13.4	20	134.5
1012C2H5_120	167	1012	C	2	H	5	120	123	13.6	20	136.23
1012C2H6_20	167	1012	C	2	H	6	20	23	14.1	20	141.24
1012C2H6_80	167	1012	C	2	H	6	80	83	15.1	20	150.5
1012C2H6_110	167	1012	C	2	H	6	110	113	15.7	20	156.32
1012C3H1_2	167	1012	C	3	H	1	2	5	16.81	20	186.81
1012C3H1_133	167	1012	C	3	H	1	133	136	18.12	20	205.291
1012C3H2_89	167	1012	C	3	H	2	89	92	19.18	20	220.26
1012C3H3_89	167	1012	C	3	H	3	89	92	20.68	20	242.34
1012C3H4_89	167	1012	C	3	H	4	89	92	22.68	20	265.61
1012C3H5_99	167	1012	C	3	H	5	99	102	23.78	20	280.5
1012C3H6_99	167	1012	C	3	H	6	99	102	25.28	20	301.46
1012C3H7_39	167	1012	C	3	H	7	39	42	26.18	20	318.31
1012C4H1_96	167	1012	C	4	H	1	96	99	27.58	20	339.21
1012C4H2_126	167	1012	C	4	H	2	126	129	29.38	20	370.962
1012C4H3_76	167	1012	C	4	H	3	76	79	30.38	20	386.58
1012C4H4_16	167	1012	C	4	H	4	16	19	31.28	20	398.19
1012C4H5_26	167	1012	C	4	H	5	26	29	32.88	20	420.51
1012C4H6_26	167	1012	C	4	H	6	26	29	34.38	20	445.48
1012C4H7_16	167	1012	C	4	H	7	16	19	35.78	20	467.82
1012A5H1_121	167	1012	A	5	H	1	121	124	36.58	20	483.11
1012C5H1_21	167	1012	C	5	H	1	21	24	37.48	20	496.1

## Sheet: Table S3
[mcd]	[cal ka BP]
Depth	Tuned age	d15N (corr.)	error	analysed sediment (g)	N (%)	error	d13C (corr.)	error	TOC (%)	error	C/N (atomic)																												d15N				d15N (corr.)				N (%)
0.25	7	9.20318	x	4.501	0.382072	0	-21.6262	0	5.12711	x	15.6558																												9.103				9.20318				0.382072
0.45	8.3	9.13218	x	4.87	0.308478	0	-22.0533	0	4.94109	x	18.6872	Note:																											9.032				9.13218				0.308478
0.6	9.33	9.95968	0.0285	4.83631	0.310059	0.00296689	-21.7559	0.0920342	4.25955	0.197508	16.0275	Errors (STD using 2-sigma), are based on three measurements of the same sample. When no error is noted, the sample was measured once.																											9.888	9.831	9.8595	0.0285	9.98818	9.93118	9.95968	0.0285	0.313026	0.307092	0.310059
0.7	9.6	10.0082	x	4.852	0.316563	0	-21.697	0	4.13443	x	15.2371																												9.908				10.0082				0.316563
1.15	9.8	9.68718	x	4.93406	0.341678	0	-21.7079	0.00812516	4.73066	-0.0530337	16.1529																												9.587				9.68718				0.341678
1.65	16.85	5.91518	x	4.807	0.415962	0	-22.3825	0	6.13225	x	17.1994																												5.815				5.91518				0.415962
2.15	20.66	5.91018	x	4.899	0.417217	0	-22.4571	0	6.17355	x	17.2631																												5.81				5.91018				0.417217
2.65	21	6.44868	0.0045	4.727	0.390559	-0.000463058	-22.5647	0	6.21576	x	18.5676																												6.353	6.344	6.3485	0.0045	6.45318	6.44418	6.44868	0.0045	0.390096	0.391022	0.390559
2.85	21.76	8.52518	x	4.789	0.342908	0	-22.3757	0	5.21836	x	17.7543																												8.425				8.52518				0.342908
3.05	25.4	7.23318	x	4.76422	0.300679	0	-22.3025	0.00284563	4.24001	-0.0316078	16.4517																												7.133				7.23318				0.300679
3.25	29.4	7.72818	x	4.848	0.317402	0	-22.1163	0	4.60349	x	16.9209																												7.628				7.72818				0.317402
3.55	32.1	7.24118	x	4.765	0.320661	0	-22.0548	0	4.13156	x	15.032																												7.141				7.24118				0.320661
3.75	33	6.89018	0.055	5.292	0.321148	0.000180011	-22.14	0	4.2096	x	15.2926																												6.845	6.735	6.79	0.055	6.94518	6.83518	6.89018	0.055	0.321328	0.320968	0.321148
4.05	33.55	6.25818	x	4.849	0.305648	0	-22.3536	0	3.89954	x	14.8847																												6.158				6.25818				0.305648
4.35	34.84	6.00418	x	4.92514	0.388273	0	-22.2965	-0.0108063	5.29447	0.0297837	15.9086																												5.904				6.00418				0.388273
4.65	38.83	8.09618	x	4.92	0.289869	0	-22.3698	0	4.08221	x	16.4301																												7.996				8.09618				0.289869
4.9	41.44	7.70518	x	4.987	0.293222	0	-22.235	0	3.76736	x	14.9895																												7.605				7.70518				0.293222
5.05	44.5	8.33618	0.06	4.82	0.313478	0.00269132	-22.1471	0	4.30734	x	16.0306																												8.296	8.176	8.236	0.06	8.39618	8.27618	8.33618	0.06	0.316169	0.310786	0.313478
5.15	46.6	8.42118	x	4.48321	0.302287	0	-22.2279	-0.0132497	4.46366	0.128407	17.2273																												8.321				8.42118				0.302287
5.3	48	7.82318	x	4.982	0.286476	0	-22.3364	0	4.47798	x	18.2365																												7.723				7.82318				0.286476
5.45	48.8	7.59818	x	4.983	0.315093	0	-22.3041	0	4.1796	x	15.4754																												7.498				7.59818				0.315093
5.6	49.7	7.26418	x	4.922	0.347764	0	-22.3499	0	4.77468	x	16.0179																												7.164				7.26418				0.347764
5.9	50.8	7.40318	0.001	5.017	0.333554	0.00229512	-22.0825	0	4.69176	x	16.4103																												7.304	7.302	7.303	0.001	7.40418	7.40218	7.40318	0.001	0.335849	0.331259	0.333554
6.05	51.7	8.24418	x	5.23486	0.302615	0	-22.475	0.0150258	4.15917	0.00408198	16.0348																												8.144				8.24418				0.302615
6.2	53.3	7.75118	x	5.72	0.357659	0	-22.4289	0	4.62267	x	15.0789																												7.651				7.75118				0.357659
6.35	63.1	6.01718	x	5.52	0.287688	0	-22.8932	0	3.36384	x	13.6414																												5.917				6.01718				0.287688
6.45	64.8	5.74918	x	5.55	0.284293	0	-22.8377	0	3.67519	x	15.0821																												5.649				5.74918				0.284293
6.6	68.9	6.20218	0.02	5.67	0.338186	-0.000681323	-22.5708	0	4.68425	x	16.1596																												6.122	6.082	6.102	0.02	6.22218	6.18218	6.20218	0.02	0.337505	0.338867	0.338186
6.75	70.7	6.49618	x	5.79792	0.316171	0	-22.6477	-0.0855019	4.09555	0.129661	15.1125																												6.396				6.49618				0.316171
6.95	75	8.18018	x	5.46	0.461334	0	-22.3643	0	5.87182	x	14.8492																												8.08				8.18018				0.461334
7.15	76	8.34018	x	5.45	0.390328	0	-22.0599	0	4.77485	x	14.2717																												8.24				8.34018				0.390328
7.35	78.2	7.86018	0.014	5.5	0.411667	0.000181738	-21.9245	0	5.12687	x	14.5296																												7.774	7.746	7.76	0.014	7.87418	7.84618	7.86018	0.014	0.411849	0.411485	0.411667
7.55	81	7.47718	x	5.48	0.420515	0	-21.786	0	5.15878	x	14.3124																												7.377				7.47718				0.420515
7.7	85.2	7.12618	x	5.70585	0.427902	0	-21.6093	-0.0368434	5.54846	0.17644	15.1278																												7.026				7.12618				0.427902
7.85	86.4	7.22618	x	5.48	0.490494	0	-21.7146	0	5.90689	x	14.0498																												7.126				7.22618				0.490494
8.05	88.6	6.36818	x	5.29	0.431051	0	-22.2246	0	4.80916	x	13.0163																												6.268				6.36818				0.431051
8.2	90.2	5.77718	x	5.79	0.310884	0	-22.8579	0	3.71704	x	13.9491																												5.677				5.77718				0.310884
8.4	91	7.43718	0.032	5.78456	0.411816	-0.00220605	-22.0525	0.0305675	4.86856	0.375845	13.7925																												7.369	7.305	7.337	0.032	7.46918	7.40518	7.43718	0.032	0.40961	0.414022	0.411816
8.6	92	7.11118	x	5.77327	0.475613	0	-22.1269	-0.0389073	6.26425	0.00729322	15.366																												7.011				7.11118				0.475613
8.9	92.6	7.04418	x	5.23	0.551955	0	-21.9873	0	7.43017	x	15.7051																												6.944				7.04418				0.551955
9.2	93	6.97918	x	5.53	0.596825	0	-21.9007	0	7.16481	x	14.0057																												6.879				6.97918				0.596825
9.4	93.5	6.48418	x	5.74	0.426205	0	-22.5245	0	5.07952	x	13.9044																												6.384				6.48418				0.426205
9.6	95	7.37118	x	5.21	0.494367	0	-22.5578	0	6.00412	x	14.1692																												7.271				7.37118				0.494367
9.9	96.6	6.84118	0.062	5.26656	0.425483	-0.00287899	-22.4688	0.0332671	5.60548	0.0667218	15.3701																												6.803	6.679	6.741	0.062	6.90318	6.77918	6.84118	0.062	0.422604	0.428362	0.425483
10.1	98.2	6.70618	x	5.55	0.337124	0	-22.473	0	4.23415	x	14.6529																												6.606				6.70618				0.337124
10.25	98.3	7.39118	x	5.7	0.316894	0	-22.7665	0	3.74081	x	13.772																												7.291				7.39118				0.316894
10.4	99.5	7.68118	x	6.03	0.405365	0	-22.292	0	5.03873	x	14.5018																												7.581				7.68118				0.405365
10.6	100.2	7.06618	x	5.79	0.286615	0	-22.4399	0	3.21678	x	13.0939																												6.966				7.06618				0.286615
10.8	103.5	7.96618	x	5.88186	0.280281	0	-22.2463	0.0593374	3.3483	0.0590042	13.9372																												7.866				7.96618				0.280281
11	106.1	8.25568	0.0575	6.1	0.292894	-0.0017372	-22.1428	0	3.51379	x	13.9963																												8.213	8.098	8.1555	0.0575	8.31318	8.19818	8.25568	0.0575	0.291157	0.294632	0.292894
11.2	106.7	8.16018	x	5.71	0.324791	0	-22.3278	0	4.23513	x	15.2128																												8.06				8.16018				0.324791
11.5	109.5	6.67718	x	5.75	0.261396	0	-22.8934	0	3.96881	x	17.7137																												6.577				6.67718				0.261396
11.7	111.95	6.48118	x	5.65	0.164599	0	-23.0392	0	2.08985	x	14.8128																												6.381				6.48118				0.164599
11.9	116.5	8.36618	x	5.67295	0.148713	0	-22.8403	0.00936679	1.60922	0.018056	12.6245																												8.266				8.36618				0.148713
12.1	120.4	9.15917	x	5.68	0.130971	0	-22.8568	0	1.78393	x	15.8909																												9.077				9.15917				0.130971
12.3	121.7	8.55417	x	6	0.17114	0	-22.5109	0	2.55914	x	17.4458																												8.472				8.55417				0.17114
12.5	123.1	8.42517	x	5.76	0.229999	0	-22.4902	0	2.95024	x	14.9651																												8.343				8.42517				0.229999
12.7	124.5	7.57717	x	5.83	0.334825	-0.00103743	-22.6396	0	4.65075	x	16.2051																												7.495	7.495	7.495	0	7.57717	7.57717	7.57717	0	0.333788	0.335863	0.334825
12.9	125.8	7.07317	x	5.63827	0.173937	0	-22.9207	0.0270897	2.78276	0.0635322	18.6651																												6.991				7.07317				0.173937
13.05	127	6.96317	x	5.61	0.167684	0	-22.7915	0	2.7397	x	19.0616																												6.881				6.96317				0.167684
13.15	128.21	6.71517	x	5.77	0.191735	0	-22.7569	0	3.00968	x	18.3132																												6.633				6.71517				0.191735
13.3	129.3	6.19117	x	5.73	0.242831	0	-22.5024	0	4.73718	x	22.7595																												6.109				6.19117				0.242831
13.5	131.95	6.27717	x	5.79	0.269219	0	-22.4413	0	4.40263	x	19.0789																												6.195				6.27717				0.269219
13.7	134.5		x	5.54726		0	-22.4674	-0.0101577	4.68225	0.0661309
14	136.23	6.81717	0.049	5.49	0.273118	0.00217842	-22.6962	0	4.4619	x	19.0597																												6.784	6.686	6.735	0.049	6.86617	6.76817	6.81717	0.049	0.275296	0.27094	0.273118
14.2	138.74	6.87717	x	5.5	0.289465	0	-22.5944	0	5.30314	x	21.3739																												6.795				6.87717				0.289465
14.5	141.24	6.43517	x	5.71	0.170816	0	-22.9112	0	3.05013	x	20.8324																												6.353				6.43517				0.170816
14.7	146.5	7.0616	x	5.68	0.175005	0	-22.6264	0	2.84402	x	18.9596																												7.061				7.0616				0.175005
14.9	148.7	7.6576	x	5.7443	0.214086	0	-22.5895	-0.0543304	3.14161	0.00856554	17.1203																												7.657				7.6576				0.214086
15	149.5	7.8396	x	5.6	0.245733	0	-22.5232	0	3.81966	x	18.1346																												7.839				7.8396				0.245733
15.1	150.5	7.06167	0.0455	5.66	0.269564	0.00566765	-22.4826	0	4.85437	x	21.0096																												7.025	6.934	6.9795	0.0455	7.10717	7.01617	7.06167	0.0455	0.275231	0.263896	0.269564
15.25	152.6	7.34217	x	5.23	0.338266	0	-22.5057	0	6.2832	x	21.6705																												7.26				7.34217				0.338266
15.4	156.32	6.8606	0.053	6.64209	0.272347	0.00064664	-22.3384	-0.0418987	4.15135	0.781324	17.7833																												6.807	6.913	6.86	-0.053	6.8076	6.9136	6.8606	0.053	0.272994	0.271701	0.272347
[truncated: 18 more columns]

## Sheet: Table S4
[mcd]	[cal ka BP]	Ladderane concentration (ng/gTOC)
Depth	Tuned age	C14[5]	C14[3]	C16[5]	C16[3]	C18[5]	C18[3]	C20[5]	C20[3]	SC-ladderanes [ng gTOC-1]	Ladderanes [ng gTOC-1]	Ladderanes [ng gTOC-1]
0.25	7	93.2546	97.2031	120.057	0	106.811	75.5956	79.4219	207.782	310.514	469.61	780.125
0.55	8.3	70.0999	86.6214	82.968	0	43.9849	20.8889	42.5357	119.018	239.689	226.428	466.117
0.85	9.33	55.7666	67.2417	92.3445	0	50.8974	31.5865	44.691	118.368	215.353	245.543	460.896
0.95	9.6	98.1616	102.827	143.778	0	62.9104	42.4682	65.5754	161.109	344.766	332.063	676.829
1	9.8	94.0336	99.5947	132.18	0	49.2295	31.0026	39.7966	106.98	325.808	227.008	552.817
1.65	16.85	45.2214	54.8247	80.2996	0	22.4214	14.6618	20.2472	55.4452	180.346	112.776	293.121
2.15	20.66	57.2268	55.8279	63.3358	0	24.2988	10.9043	24.273	40.4439	176.391	99.9199	276.31
2.25	21	157.632	184.036	197.744	0	49.4586	28.1116	42.6557	104.146	539.411	224.372	763.783
2.35	21.76	65.9267	76.4647	98.8313	0	35.9308	20.0208	24.3627	67.1188	241.223	147.433	388.656
2.75	25.4	113.034	137.166	145.35	0	46.6645	26.937	30.0068	83.8404	395.55	187.449	582.998
3.15	29.4	37.0747	47.763	67.781	0	22.0701	16.6862	21.6723	42.6939	152.619	103.123	255.741
3.35	32.1	77.6809	110.759	115.121	0	37.6603	22.6178	41.3442	78.649	303.561	180.271	483.832
3.45	33	71.495	85.4684	118.12	0	27.6386	18.0534	20.5894	40.2235	275.083	106.505	381.588
3.55	33.55	86.2283	98.8905	120.196	0	35.7664	21.2357	24.3083	51.7782	305.315	133.089	438.403
3.65	34.84	105.628	132.771	158.554	0	40.1893	30.1582	28.0062	72.3729	396.953	170.727	567.68
4	38.83	50.8409	74.7956	89.1125	0	23.6591	9.76033	9.42682	33.9749	214.749	76.8211	291.57
4.25	41.44	45.1264	109.319	94.7275	0	27.7949	21.4234	26.4736	50.6677	249.173	126.36	375.532
4.65	44.5	56.7428	86.0583	81.2048	0	24.2252	11.2795	16.1677	35.9847	224.006	87.657	311.663
4.75	46.6	39.8927	54.9195	65.3928	0	9.5918	8.79692	7.61156	18.165	160.205	44.1652	204.37
4.95	48	45.4881	61.4798	79.0652	0	26.4042	18.3939	15.3079	34.0417	186.033	94.1477	280.181
5.05	48.8	96.1561	110.34	122.662	0	41.2312	31.9539	36.4002	71.4819	329.158	181.067	510.226
5.15	49.7	62.4365	86.0696	78.1318	0	25.536	20.6388	20.1211	48.2611	226.638	114.557	341.195
5.3	50.8	80.6489	100.992	116.825	0	32.5425	21.9021	23.1936	45.8876	298.467	123.526	421.992
5.4	51.7	69.2636	94.607	114.983	0	29.4288	20.4416	19.052	46.8699	278.853	115.792	394.646
6	63.1	30.2537	47.5121	55.8308	0	13.8155	9.52171	11.3859	24.913	133.597	59.6361	193.233
6.45	68.9	58.0166	79.4448	73.8268	0	18.2898	12.0961	16.2486	27.0918	211.288	73.7263	285.014
6.55	70.7	47.0511	67.541	76.2213	0	21.9238	14.4663	15.2275	30.8135	190.813	82.4311	273.245
7.35	75	34.2399	42.9739	45.4417	0	13.8791	10.1766	12.5616	26.1001	122.655	62.7173	185.373
7.85	81	47.7544	72.8403	71.7627	0	16.231	12.9174	13.7872	23.332	192.357	66.2676	258.625
8.05	85.2	37.8696	61.9907	63.8386	0	11.4211	5.80762	9.1507	12.1584	163.699	38.5379	202.237
8.4	88.6	73.4348	119.367	138.395	0	18.3954	14.524	22.9443	36.4808	331.196	92.3444	423.541
8.75	91	22.0457	36.0622	45.3894	0	8.48546	7.44133	6.419	15.4604	103.497	37.8061	141.303
9	93	75.5118	125.851	136.094	0	23.0761	21.1626	15.0396	28.3556	337.457	87.6339	425.091
9.5	96.6	39.1915	68.2609	68.316	0	19.4652	15.1599	11.8512	30.9919	175.768	77.4682	253.237
9.8	98.3	61.547	86.4109	95.5477	0	16.9327	12.3365	12.757	28.4465	243.506	70.4726	313.978
10.1	100.2	49.7561	85.3754	93.7779	0	26.6408	17.4663	18.0385	45.7441	228.909	107.89	336.799
10.4	103.5	39.9973	59.2846	61.1465	0	19.8317	13.8393	12.3801	31.5286	160.428	77.5797	238.008
10.7	106.7	48.6811	84.4254	82.0515	0	22.6383	16.2131	17.416	30.4652	215.158	86.7327	301.891
11.2	111.95	18.5908	27.2141	34.3795	0	13.9276	6.33122	10.4939	27.4601	80.1843	58.2128	138.397
12.3	121.7	36.6303	60.552	70.9349	0	30.7059	11.3431	12.2084	39.3244	168.117	93.5819	261.699
12.4	123.1	41.3	76.8743	75.2867	0	21.419	16.3444	14.0851	31.357	193.461	83.2055	276.667
12.6	124.5	30.4415	51.7634	60.6329	0	16.7631	13.6778	8.17488	19.8812	142.838	58.497	201.335
12.7	125.8	15.6637	41.5527	46.1715	0	10.0335	5.48686	5.89075	21.3558	103.388	42.7669	146.155
12.8	127	23.5224	46.2245	47.3896	0	13.1478	3.45811	5.282	13.2589	117.137	35.1468	152.283
12.9	128.21	37.7443	65.8772	67.0837	0	27.0625	14.2919	17.8733	32.6611	170.705	91.8889	262.594
13	129.3	33.8128	59.8249	60.6237	0	14.7606	6.84022	5.57758	18.635	154.261	45.8134	200.075
13.2	131.95	48.2756	76.9108	92.5685	0	21.2014	9.03538	15.3454	14.955	217.755	60.5373	278.292
13.4	134.5	59.624	114.719	103.696	0	22.3024	8.53148	14.3219	29.5677	278.04	74.7235	352.763
13.6	136.23	47.2537	86.4331	80.3919	0	16.6006	11.0967	13.7309	27.4899	214.079	68.9181	282.997
14.1	141.24	17.8606	30.258	39.1004	0	8.40275	5.49365	6.11196	14.5965	87.2191	34.6049	121.824
15.1	150.5	17.7435	33.8895	42.7873	0	6.47855	8.10225	6.32994	15.1826	94.4203	36.0934	130.514
15.7	156.32	27.3049	47.6162	46.7193	0	6.67408	6.91137	7.46324	10.1976	121.64	31.2463	152.887

## Sheet: Table S5
[mcd]	[cal ka BP]	(SC-)Ladderane concentrations [pg g Dry weight-1]
Depth	Tuned age	C14[5]	C14[3]	C16[5]	C16[3]	C18[5]	C18[3]	C20[5]	C20[3]	SC-ladderanes	Ladderanes
0.25	7	4781.26	4550.46	6155.44	0	5476.32	3538.92	4072.04	9727.07	15487.2	22814.4
0.55	8.3	2455.29	2770.21	2906	0	1540.6	668.041	1489.84	3806.29	8131.49	7504.76
0.85	9.33	2485.55	2736.46	4115.84	0	2268.52	1285.44	1991.9	4817.08	9337.85	10362.9
0.95	9.6	4058.43	3881.72	5944.4	0	2600.99	1603.18	2711.17	6081.89	13884.5	12997.2
1	9.8	4398.54	4253.67	6182.88	0	2302.77	1324.12	1861.53	4569.09	14835.1	10057.5
1.65	16.85	2773.09	3069.72	4924.17	0	1374.94	820.938	1241.61	3104.46	10767	6541.94
2.15	20.66	2504.36	2230.75	2771.7	0	1063.36	435.709	1062.24	1616.04	7506.82	4177.35
2.25	21	9798.02	10444.8	12291.3	0	3074.23	1595.45	2651.38	5910.7	32534	13231.8
2.35	21.76	3440.29	3643.32	5157.37	0	1875	953.935	1271.34	3198.02	12241	7298.28
2.75	25.4	4756.9	5270.67	6116.91	0	1963.83	1035.07	1262.8	3221.61	16144.5	7483.31
3.15	29.4	1706.73	2007.62	3120.29	0	1016	701.368	997.679	1794.55	6834.64	4509.59
3.35	32.1	2275.05	2961.81	3371.56	0	1102.96	604.825	1210.85	2103.16	8608.42	5021.8
3.45	33	3009.65	3285.1	4972.36	0	1163.47	693.907	866.729	1546.05	11267.1	4270.15
3.55	33.55	3362.5	3521.03	4687.09	0	1394.72	756.104	947.909	1843.58	11570.6	4942.32
3.65	34.84	5561	6382.31	8347.36	0	2115.84	1449.71	1474.44	3478.97	20290.7	8518.96
4	38.83	2075.43	2787.88	3637.76	0	965.814	363.799	384.823	1266.35	8501.07	2980.79
4.25	41.44	2160.53	4778.88	4535.29	0	1330.74	936.525	1267.48	2214.94	11474.7	5749.69
4.65	44.5	2444.1	3384.57	3497.76	0	1043.46	443.608	696.396	1415.24	9326.44	3598.7
4.75	46.6	1729.45	2173.92	2834.94	0	415.829	348.215	329.98	719.037	6738.31	1813.06
4.95	48	2036.95	2513.72	3540.52	0	1182.37	752.069	685.486	1391.86	8091.19	4011.79
5.05	48.8	4018.94	4210.85	5126.8	0	1723.3	1219.44	1521.38	2727.93	13356.6	7192.05
5.15	49.7	2113.22	2659.86	2644.45	0	864.289	637.812	681.019	1491.44	7417.53	3674.56
5.3	50.8	3783.85	4326.4	5481.16	0	1526.82	938.259	1088.19	1965.78	13591.4	5519.04
5.4	51.7	2877.96	3589.27	4777.64	0	1222.79	775.528	791.628	1778.18	11244.9	4568.13
6	63.1	1017.69	1459.29	1878.06	0	464.731	292.45	383.002	765.179	4355.04	1905.36
6.45	68.9	2717.64	3397.88	3458.23	0	856.741	517.352	761.125	1158.73	9573.75	3293.94
6.55	70.7	1988.01	2605.66	3220.51	0	926.327	558.096	643.392	1188.75	7814.18	3316.57
7.35	75	2010.5	2303.99	2668.26	0	814.956	545.603	737.594	1399.32	6982.75	3497.47
7.85	81	2448.31	3409.79	3679.18	0	832.144	604.687	706.851	1092.21	9537.27	3235.9
8.05	85.2	2167.99	3240.38	3654.7	0	653.848	303.577	523.868	635.548	9063.07	2116.84
8.4	88.6	1769.33	2625.99	3334.48	0	443.216	319.518	552.818	802.553	7729.79	2118.11
8.75	91	1156.17	1726.84	2380.4	0	445.012	356.327	336.639	740.318	5263.41	1878.3
9	93	5410.27	8233.1	9750.91	0	1653.36	1384.44	1077.56	1855.01	23394.3	5970.37
9.5	96.6	2170.72	3452.13	3783.86	0	1078.13	766.678	656.408	1567.34	9406.71	4068.56
9.8	98.3	2302.36	2951.46	3574.26	0	633.418	421.367	477.214	971.619	8828.07	2503.62
10.1	100.2	1600.54	2507.59	3016.63	0	856.977	513.008	580.257	1343.57	7124.76	3293.81
10.4	103.5	1362.83	1844.4	2083.45	0	675.727	430.554	421.826	980.885	5290.67	2508.99
10.7	106.7	2061.71	3264.69	3474.99	0	958.762	626.955	737.592	1178.08	8801.4	3501.39
11.2	111.95	388.52	519.293	718.481	0	291.066	120.811	219.308	523.987	1626.29	1155.17
12.3	121.7	937.423	1414.9	1815.33	0	785.809	265.051	312.43	918.881	4167.65	2282.17
12.4	123.1	1218.45	2070.82	2221.14	0	631.914	440.28	415.545	844.685	5510.41	2332.42
12.6	124.5	1415.76	2198.1	2819.88	0	779.609	580.821	380.193	844.245	6433.74	2584.87
12.7	125.8	425.93	1031.68	1255.51	0	272.833	136.23	160.183	530.23	2713.12	1099.48
12.8	127	644.444	1156.32	1298.34	0	360.21	86.5058	144.711	331.676	3099.1	923.104
12.9	128.21	1135.98	1810.33	2019	0	814.495	392.747	537.928	897.539	4965.31	2642.71
13	129.3	1601.77	2587.64	2871.85	0	699.235	295.864	264.22	806.029	7061.26	2065.35
13.2	131.95	2125.4	3091.73	4075.45	0	933.422	363.213	675.601	601.177	9292.58	2573.41
13.4	134.5	2831.18	4973.75	4923.91	0	1059	369.89	680.058	1281.93	12728.8	3390.89
13.6	136.23	2108.41	3521.29	3587	0	740.702	452.081	612.657	1119.94	9216.71	2925.38
14.1	141.24	544.772	842.679	1192.62	0	256.295	152.997	186.423	406.51	2580.07	1002.22
15.1	150.5	861.335	1502.1	2077.05	0	314.492	359.121	307.278	672.949	4440.49	1653.84
15.7	156.32	1346.86	2144.57	2304.51	0	329.21	311.278	368.137	459.287	5795.94	1467.91
16.81	186.81	765.718	1159.38	1813.34	0	313.301	271.881	204.47	618.472	3738.44	1408.12
18.12	205.291	682.858	1719.44	1870.57	0	325.623	331.343	325.873	497.342	4272.87	1480.18
19.18	220.26	624.049	1411.67	1452.37	0	598.525	393.667	503.943	1043.56	3488.09	2539.7
20.68	242.34	796.077	1661.41	1864.83	0	386.596	283.479	250.787	815.358	4322.32	1736.22
22.68	265.61	89.5037	163.765	288.118	0	63.7986	43.0881	54.1886	163.195	541.387	324.271
23.78	280.5	397.544	1242.31	1415.11	0	303.46	283.837	260.927	456.627	3054.96	1304.85
25.28	301.46	458.657	1058.88	1479.71	0	253.662	141.863	301.623	752.801	2997.25	1449.95
26.18	318.31	169.403	601.692	981.461	0	142.092	103.122	76.5745	191.34	1752.56	513.129
27.58	339.21	168.246	611.49	800.486	0	190.163	69.4736	313.313	333.901	1580.22	906.85
29.38	370.962	239.984	933.21	1135.72	0	144.196	68.145	91.1613	157.152	2308.91	460.654
30.38	386.58	222.581	855.277	1063.42	0	128.134	33.9932	152.69	72.8586	2141.28	387.676
31.28	398.19	95.7725	207.409	289.192	0	35.9815	0	51.1348	0	592.374	87.1162
32.88	420.51	122.008	393.945	609.681	0	107.761	99.3698	181.39	130.59	1125.63	519.111
34.38	445.48	267.71	1083.83	1080.39	0	146.607	0	261.781	178.565	2431.93	586.952
35.78	467.82	135.374	620.043	685.756	0	126.501	0	243.683	0	1441.17	370.184
36.58	483.11	0	254.718	468.384	0	74.448	0	160.872	0	723.102	235.32
37.48	496.1	213.102	854.055	1170.8	0	111.193	0	386.293	288.311	2237.96	785.797

## Sheet: Table S6
[mcd]	[cal ka BP]		[degrees C]
Depth	Tuned age	NL5 index	NL5 Temperature
0.25	7	0.426465	15.1935
0.55	8.3	0.491625	15.7949
0.85	9.33	0.467536	15.5796
0.95	9.6	0.51037	15.9589
1	9.8	0.447021	15.3904
1.65	16.85	0.474522	15.6427
2.15	20.66	0.499735	15.8662
2.25	21	0.463073	15.539
2.35	21.76	0.404069	14.968
2.75	25.4	0.391369	14.8337
3.15	29.4	0.495452	15.8286
3.35	32.1	0.523314	16.0708
3.45	33	0.426918	15.198
3.55	33.55	0.404634	14.9739
3.65	34.84	0.410676	15.0359
4	38.83	0.284919	13.3299
4.25	41.44	0.487826	15.7614
4.65	44.5	0.40026	14.9283
4.75	46.6	0.442446	15.3473
4.95	48	0.36699	14.5591
5.05	48.8	0.468886	15.5919
5.15	49.7	0.440701	15.3308
5.3	50.8	0.416132	15.0911
5.4	51.7	0.392981	14.8511
6	63.1	0.451796	15.4351
6.45	68.9	0.47045	15.606
6.55	70.7	0.409877	15.0278
7.35	75	0.475086	15.6478
7.85	81	0.459294	15.5044
8.05	85.2	0.444817	15.3697
8.4	88.6	0.555019	16.343
8.75	91	0.430677	15.2346
9	93	0.394578	14.8682
9.5	96.6	0.378434	14.6911
9.8	98.3	0.429678	15.2249
10.1	100.2	0.403732	14.9645
10.4	103.5	0.384333	14.7569
10.7	106.7	0.43481	15.2745
11.2	111.95	0.429701	15.2251
12.3	121.7	0.284483	13.3211
12.4	123.1	0.396717	14.8909
12.6	124.5	0.327809	14.0516
12.7	125.8	0.369924	14.5935
12.8	127	0.286601	13.3634
12.9	128.21	0.397751	14.9019
13	129.3	0.274242	13.1025
13.2	131.95	0.419883	15.1286
13.4	134.5	0.391049	14.8303
13.6	136.23	0.452694	15.4434
14.1	141.24	0.421087	15.1406
15.1	150.5	0.494199	15.8176
15.7	156.32	0.527911	16.1104
16.81	186.81	0.394904	14.8716
18.12	205.291	0.500192	15.8702
19.18	220.26	0.457105	15.4842
20.68	242.34	0.393464	14.8562
22.68	265.61	0.459275	15.5042
23.78	280.5	0.462319	15.5321
25.28	301.46	0.543186	16.2416
26.18	318.31	0.350188	14.3535
27.58	339.21	0.6223	16.9288
29.38	370.962	0.387332	14.7899
30.38	386.58	0.543721	16.2462
31.28	398.19	0.586972	16.6181
32.88	420.51	0.62732	16.9739
34.38	445.48	0.641011	17.0984
35.78	467.82	0.658275	17.2595
36.58	483.11	0.68363	17.5065
37.48	496.1	0.77649	18.611

## Sheet: Table S7
[mcd]	[cal ka BP]	(SC-)Ladderane concentrations [pg g Dry weight-1]		[ng g dry weight-1 kyr-1]
Depth	Tuned age	SC-ladderanes	Ladderanes	SC-ladderanes R	Ladderanes R	SC-ladderanes k' (canuel & martens, 1996)	ladderanes k' (canuel & martens, 1996)
0.25	7	15487.2	22814.4	x	x	x	x
0.55	8.3	8131.49	7504.76	-4.02988	-6.41861	0.495589	0.855271
0.85	9.33	9337.85	10362.9	-2.02762	-3.50985	0.217139	0.338692
0.95	9.6	13884.5	12997.2	-0.583336	-2.81267	0.0420133	0.216405
1	9.8	14835.1	10057.5	-0.227907	-2.94208	0.0153627	0.292525
1.65	16.85	10767	6541.94	-0.39737	-0.829635	0.0369064	0.126818
2.15	20.66	7506.82	4177.35	-0.397982	-0.519176	0.0530161	0.124284
2.25	21	32534	13231.8	1.72495	-0.514876	-0.0530197	0.0389122
2.35	21.76	12241	7298.28	-0.195077	-0.563565	0.0159364	0.0772189
2.75	25.4	16144.5	7483.31	0.036472	-0.453356	-0.0022591	0.0605824
3.15	29.4	6834.64	4509.59	-0.249589	-0.326378	0.0365182	0.0723743
3.35	32.1	8608.42	5021.8	-0.201413	-0.302829	0.0233972	0.0603029
3.45	33	11267.1	4270.15	-0.137859	-0.275218	0.0122355	0.0644515
3.55	33.55	11570.6	4942.32	-0.127055	-0.284729	0.0109809	0.0576104
3.65	34.84	20290.7	8518.96	0.196894	-0.301437	-0.00970367	0.0353842
4	38.83	8501.07	2980.79	-0.160198	-0.190591	0.0188445	0.0639397
4.25	41.44	11474.7	5749.69	-0.0999094	-0.230095	0.00870693	0.0400187
4.65	44.5	9326.44	3598.7	-0.126133	-0.17723	0.0135242	0.0492485
4.75	46.6	6738.31	1813.06	-0.141607	-0.115943	0.0210152	0.0639488
4.95	48	8091.19	4011.79	-0.128124	-0.170076	0.015835	0.042394
5.05	48.8	13356.6	7192.05	-0.0472918	-0.198627	0.00354071	0.0276176
5.15	49.7	7417.53	3674.56	-0.127881	-0.157133	0.0172404	0.0427624
5.3	50.8	13591.4	5519.04	-0.0405175	-0.178825	0.00298111	0.0324015
5.4	51.7	11244.9	4568.13	-0.0805251	-0.164359	0.00716105	0.0359796
6	63.1	4355.04	1905.36	-0.0984873	-0.0843223	0.0226146	0.0442552
6.45	68.9	9573.75	3293.94	-0.0743916	-0.102985	0.00777037	0.031265
6.55	70.7	7814.18	3316.57	-0.0839161	-0.100406	0.0107389	0.0302741
7.35	75	6982.75	3497.47	-0.0817976	-0.0964556	0.0117142	0.0275787
7.85	81	9537.27	3235.9	-0.0624825	-0.0854051	0.0065514	0.026393
8.05	85.2	9063.07	2116.84	-0.0620975	-0.064357	0.0068517	0.0304024
8.4	88.6	7729.79	2118.11	-0.0658291	-0.0616968	0.00851629	0.0291283
8.75	91	5263.41	1878.3	-0.0676243	-0.0558351	0.012848	0.0297265
9	93	23394.3	5970.37	0.112206	-0.093067	-0.00479628	0.0155882
9.5	96.6	9406.71	4068.56	-0.0523445	-0.078288	0.0055646	0.0192422
9.8	98.3	8828.07	2503.62	-0.0543487	-0.0605929	0.00615635	0.0242021
10.1	100.2	7124.76	3293.81	-0.0593553	-0.0683976	0.00833085	0.0207655
10.4	103.5	5290.67	2508.99	-0.0588863	-0.057395	0.0111302	0.0228757
10.7	106.7	8801.4	3501.39	-0.0498864	-0.0658215	0.00566801	0.0187987
11.2	111.95	1626.29	1155.17	-0.0349232	-0.0328351	0.0214741	0.0284244
12.3	121.7	4167.65	2282.17	-0.0476957	-0.0458078	0.0114443	0.020072
12.4	123.1	5510.41	2332.42	-0.0490465	-0.0458144	0.0089007	0.0196424
12.6	124.5	6433.74	2584.87	-0.0481	-0.0479073	0.00747621	0.0185337
12.7	125.8	2713.12	1099.48	-0.0397813	-0.0280658	0.0146625	0.0255266
12.8	127	3099.1	923.104	-0.0415512	-0.0246731	0.0134075	0.0267284
12.9	128.21	4965.31	2642.71	-0.0465986	-0.0469976	0.00938483	0.0177839
13	129.3	7061.26	2065.35	-0.0453461	-0.0405655	0.00642181	0.019641
13.2	131.95	9292.58	2573.41	-0.037988	-0.0449427	0.00408799	0.0174642
13.4	134.5	12728.8	3390.89	-0.0195815	-0.0506984	0.00153836	0.0149514
13.6	136.23	9216.71	2925.38	-0.0370147	-0.0464956	0.00401604	0.0158939
14.1	141.24	2580.07	1002.22	-0.0344457	-0.0233322	0.0133507	0.0232805
15.1	150.5	4440.49	1653.84	-0.0386569	-0.030245	0.00870555	0.0182877
15.7	156.32	5795.94	1467.91	-0.03815	-0.0269709	0.0065822	0.0183736
16.81	186.81	3738.44	1408.12	-0.0295512	-0.0218109	0.00790469	0.0154893
18.12	205.291	4272.87	1480.18	-0.0277485	-0.0204176	0.00649412	0.013794
19.18	220.26	3488.09	2539.7	-0.0243812	-0.0261442	0.00698986	0.0102942
20.68	242.34	4322.32	1736.22	-0.0234394	-0.0190021	0.00542288	0.0109445
22.68	265.61	541.387	324.271	-0.00702066	-0.00533354	0.0129679	0.0164478
23.78	280.5	3054.96	1304.85	-0.0181314	-0.0136511	0.00593509	0.0104618
25.28	301.46	2997.25	1449.95	-0.0167168	-0.0135701	0.00557739	0.00935903
26.18	318.31	1752.56	513.129	-0.0122666	-0.00625463	0.00699925	0.0121892
27.58	339.21	1580.22	906.85	-0.0108569	-0.0088039	0.00687049	0.00970822
29.38	370.962	2308.91	460.654	-0.0120738	-0.00493925	0.00522921	0.0107223
30.38	386.58	2141.28	387.676	-0.0111617	-0.00416189	0.00521262	0.0107355
31.28	398.19	592.374	87.1162	-0.00494207	-0.00123995	0.00834282	0.0142332
32.88	420.51	1125.63	519.111	-0.00713655	-0.00474913	0.00634003	0.00914858
34.38	445.48	2431.93	586.952	-0.010268	-0.00489957	0.00422214	0.00834748
35.78	467.82	1441.17	370.184	-0.0074262	-0.00331058	0.00515289	0.00894307
36.58	483.11	723.102	235.32	-0.00465384	-0.00226082	0.00643594	0.00960745
37.48	496.1	2237.96	785.797	-0.00885138	-0.00541181	0.00395512	0.00688703

## Sheet: Table S8
C20:5FameD5	ul injected	pg oc	area		Concentration used for use as internal standard:
10 ng/ml	1	10	1278283		4.4 pg/ul
	5	50	6557401
100 ng/ml	1	100	12654875
	5	500	64182520
1000 ng/ml	1	1000	124735413
	5	5000	630815346
	10	10000	1234040523
ladderane C20[3]
STD concentratie	ul injected	pg oc	area
33.0 ng/ml	1	29.04	2895753
33.0 ng/ml	5	145.2	14214493
330 ng/ml	1	290.4	38153937
330 ng/ml	5	1452	184991536
3.30 ug/ml	1	2904	286360519
3.30 ug/ml	5	14520	1388560812
ladderane C20[5]
STD concentratie	ul injected	pg oc	area
38.5 ng/ml	1	35.42	8082570
38.5 ng/ml	5	177.1	40796453
385 ng/ml	1	354.2	36450495
385 ng/ml	5	1771	181656573
3.85ug/ml	1	3542	348288715
3.85ug/ml	5	17710	1868333642
	Slopes
C20:5FameD5	123971
ladderane C20[3]	96061
ladderane C20[5]	105207
	RRF
RRF C20[3] ladderane	1.29054
RRF C20[5] ladderane	1.17835
Calculating of concentrations with 'New' and 'Old' method:
New method' --> use of deuterated C20:5-PUFA internal standard	(((((ladderane integrated peak area/(IS area/RRF)))*IS pg injected)*(volume dissolved/injected))*(100/percent TLE used))/gSed
'Old method' --> No internal standard	(((ladderane integrated peak area/ladderane slope)*(volume dissolved/injected))*(100/percent TLE used))))/gSed
	IS:	deuterated C20:5-PUFA internal standard
	TLE:	Total lipid extract
	gSed	grams Sediment
	RRF	Relative response factor as calculated above
	ladderane slope:	slopes of ladderane calibration curves as states above

## Sheet: Table S9
	'Old method' --> No internal standard										'New method' --> use of deuterated C20:5-PUFA internal standard
[cal ka BP]	(SC-)Ladderane concentrations [pg gSed-1]										(SC-)Ladderane concentrations [pg gSed-1]
Tuned age	C14[5]	C14[3]	C16[5]	C16[3]	C18[5]	C18[3]	C20[5]	C20[3]	[3]-(SC-)ladderanes	[5]-(SC-)ladderanes	C14[5]	C14[3]	C16[5]	C16[3]	C18[5]	C18[3]	C20[5]	C20[3]	[3]-(SC-)ladderanes	[5]-(SC-)ladderanes
7	3495.53	3643.54	4500.18	0	4003.68	2833.61	2977.03	7788.45	14265.6	14976.4	4781.26	4550.46	6155.44	0	5476.32	3538.92	4072.04	9727.07	17816.5	20485.1
8.3	1842.65	2276.94	2180.9	0	1156.19	549.088	1118.1	3128.53	5954.55	6297.84	2455.29	2770.21	2906	0	1540.6	668.041	1489.84	3806.29	7244.54	8391.71
9.33	1935.63	2333.93	3205.23	0	1766.63	1096.35	1551.2	4108.49	7538.77	8458.7	2485.55	2736.46	4115.84	0	2268.52	1285.44	1991.9	4817.08	8838.98	10861.8
9.6	2796.82	2929.74	4096.52	0	1792.44	1210	1868.37	4590.32	8730.06	10554.2	4058.43	3881.72	5944.4	0	2600.99	1603.18	2711.17	6081.89	11566.8	15315
9.8	3119.45	3303.93	4384.9	0	1633.13	1028.47	1320.2	3548.92	7881.32	10457.7	4398.54	4253.67	6182.88	0	2302.77	1324.12	1861.53	4569.09	10146.9	14745.7
16.85	3114.72	3776.16	5530.81	0	1544.32	1009.86	1394.57	3818.91	8604.93	11584.4	2773.09	3069.72	4924.17	0	1374.94	820.938	1241.61	3104.46	6995.11	10313.8
20.66	1879.48	1833.54	2080.12	0	798.036	358.125	797.19	1328.28	3519.95	5554.82	2504.36	2230.75	2771.7	0	1063.36	435.709	1062.24	1616.04	4282.5	7401.66
21	8257.43	9640.57	10358.7	0	2590.85	1472.61	2234.49	5455.61	16568.8	23441.4	9798.02	10444.8	12291.3	0	3074.23	1595.45	2651.38	5910.7	17950.9	27814.9
21.76	2384.92	2766.14	3575.25	0	1299.81	724.26	881.33	2428.04	5918.44	8141.31	3440.29	3643.32	5157.37	0	1875	953.935	1271.34	3198.02	7795.28	11744
25.4	2590.59	3143.68	3331.24	0	1069.49	617.363	687.719	1921.52	5682.56	7679.05	4756.9	5270.67	6116.91	0	1963.83	1035.07	1262.8	3221.61	9527.35	14100.4
29.4	1471.17	1895.29	2689.63	0	875.769	662.126	859.981	1694.15	4251.57	5896.55	1706.73	2007.62	3120.29	0	1016	701.368	997.679	1794.55	4503.53	6840.69
32.1	1707.39	2434.42	2530.3	0	827.754	497.128	908.724	1728.66	4660.21	5974.16	2275.05	2961.81	3371.56	0	1102.96	604.825	1210.85	2103.16	5669.8	7960.42
33	2701.98	3230.07	4464.04	0	1044.53	682.283	778.125	1520.15	5432.5	8988.68	3009.65	3285.1	4972.36	0	1163.47	693.907	866.729	1546.05	5525.05	10012.2
33.55	2617.89	3002.32	3649.16	0	1085.87	644.716	737.999	1571.99	5219.02	8090.92	3362.5	3521.03	4687.09	0	1394.72	756.104	947.909	1843.58	6120.72	10392.2
34.84	3565.03	4481.12	5351.31	0	1356.42	1017.86	945.231	2442.64	7941.62	11218	5561	6382.31	8347.36	0	2115.84	1449.71	1474.44	3478.97	11311	17498.6
38.83	1554.94	2287.58	2725.45	0	723.599	298.514	288.314	1039.1	3625.2	5292.31	2075.43	2787.88	3637.76	0	965.814	363.799	384.823	1266.35	4418.03	7063.83
41.44	904.422	2190.96	1898.52	0	557.064	429.366	530.582	1015.48	3635.81	3890.59	2160.53	4778.88	4535.29	0	1330.74	936.525	1267.48	2214.94	7930.35	9294.04
44.5	1878.71	2849.33	2688.64	0	802.08	373.456	535.301	1191.43	4414.22	5904.73	2444.1	3384.57	3497.76	0	1043.46	443.608	696.396	1415.24	5243.42	7681.72
46.6	1698.94	2338.9	2784.93	0	408.493	374.64	324.159	773.604	3487.14	5216.52	1729.45	2173.92	2834.94	0	415.829	348.215	329.98	719.037	3241.17	5310.2
48	1387.98	1875.93	2412.51	0	805.67	561.251	467.09	1038.71	3475.89	5073.25	2036.95	2513.72	3540.52	0	1182.37	752.069	685.486	1391.86	4657.65	7445.33
48.8	2216.66	2543.63	2827.7	0	950.488	736.622	839.123	1647.85	4928.1	6833.96	4018.94	4210.85	5126.8	0	1723.3	1219.44	1521.38	2727.93	8158.22	12390.4
49.7	1585.94	2186.24	1984.61	0	648.634	524.241	511.093	1225.87	3936.35	4730.28	2113.22	2659.86	2644.45	0	864.289	637.812	681.019	1491.44	4789.11	6302.98
50.8	2492.51	3121.24	3610.57	0	1005.75	676.898	716.814	1418.19	5216.33	7825.64	3783.85	4326.4	5481.16	0	1526.82	938.259	1088.19	1965.78	7230.43	11880
51.7	1946.83	2659.17	3231.89	0	827.171	574.563	535.505	1317.4	4551.13	6541.39	2877.96	3589.27	4777.64	0	1222.79	775.528	791.628	1778.18	6142.98	9670.02
63.1	1030.5	1618.35	1901.7	0	470.58	324.326	387.823	848.58	2791.25	3790.6	1017.69	1459.29	1878.06	0	464.731	292.45	383.002	765.179	2516.92	3743.48
68.9	2514.42	3443.12	3199.63	0	792.676	524.24	704.21	1174.15	5141.51	7210.94	2717.64	3397.88	3458.23	0	856.741	517.352	761.125	1158.73	5073.96	7793.74
70.7	1557.57	2235.86	2523.21	0	725.761	478.89	504.086	1020.04	3734.79	5310.63	1988.01	2605.66	3220.51	0	926.327	558.096	643.392	1188.75	4352.51	6778.24
75	1950.58	2448.15	2588.73	0	790.667	579.741	715.612	1486.87	4514.76	6045.6	2010.5	2303.99	2668.26	0	814.956	545.603	737.594	1399.32	4248.91	6231.31
81	1699.89	2592.87	2554.51	0	577.769	459.816	490.777	830.541	3883.22	5322.95	2448.31	3409.79	3679.18	0	832.144	604.687	706.851	1092.21	5106.69	7666.48
85.2	1970.15	3225.04	3321.18	0	594.18	302.139	476.061	632.538	4159.71	6361.57	2167.99	3240.38	3654.7	0	653.848	303.577	523.868	635.548	4179.51	7000.4
88.6	3025.65	4918.12	5702.13	0	757.923	598.415	945.348	1503.08	7019.61	10431	1769.33	2625.99	3334.48	0	443.216	319.518	552.818	802.553	3748.06	6099.84
91	996.651	1630.31	2051.98	0	383.614	336.41	290.193	698.937	2665.66	3722.44	1156.17	1726.84	2380.4	0	445.012	356.327	336.639	740.318	2823.48	4318.22
93	2873.6	4789.25	5179.07	0	878.159	805.34	572.332	1079.07	6673.66	9503.16	5410.27	8233.1	9750.91	0	1653.36	1384.44	1077.56	1855.01	11472.5	17892.1
96.6	1826.93	3182.01	3184.58	0	907.379	706.688	552.448	1444.7	5333.4	6471.34	2170.72	3452.13	3783.86	0	1078.13	766.678	656.408	1567.34	5786.15	7689.12
98.3	2028.91	2848.55	3149.75	0	558.188	406.675	420.535	937.742	4192.97	6157.37	2302.36	2951.46	3574.26	0	633.418	421.367	477.214	971.619	4344.44	6987.24
100.2	1177.67	2020.74	2219.61	0	630.557	413.406	426.949	1082.71	3516.85	4454.79	1600.54	2507.59	3016.63	0	856.977	513.008	580.257	1343.57	4364.16	6054.4
103.5	1218.75	1806.46	1863.19	0	604.291	421.697	377.232	960.707	3188.86	4063.47	1362.83	1844.4	2083.45	0	675.727	430.554	421.826	980.885	3255.84	4543.82
106.7	1165.93	2022.02	1965.16	0	542.195	388.311	417.12	729.653	3139.98	4090.41	2061.71	3264.69	3474.99	0	958.762	626.955	737.592	1178.08	5069.73	7233.06
111.95	310.486	454.504	574.174	0	232.605	105.738	175.26	458.613	1018.86	1292.53	388.52	519.293	718.481	0	291.066	120.811	219.308	523.987	1164.09	1617.37
121.7	800.26	1322.87	1549.71	0	670.83	247.812	266.715	859.117	2429.8	3287.51	937.423	1414.9	1815.33	0	785.809	265.051	312.43	918.881	2598.83	3850.99
123.1	745.81	1388.22	1359.55	0	386.793	295.152	254.354	566.255	2249.63	2746.51	1218.45	2070.82	2221.14	0	631.914	440.28	415.545	844.685	3355.78	4487.05
124.5	990.638	1684.5	1973.14	0	545.511	445.109	266.03	646.983	2776.6	3775.32	1415.76	2198.1	2819.88	0	779.609	580.821	380.193	844.245	3623.17	5395.44
125.8	384.897	1021.06	1134.55	0	246.549	134.826	144.751	524.768	1680.65	1910.75	425.93	1031.68	1255.51	0	272.833	136.23	160.183	530.23	1698.14	2114.45
127	587.956	1155.41	1184.53	0	328.636	86.4375	132.027	331.415	1573.26	2233.15	644.444	1156.32	1298.34	0	360.21	86.5058	144.711	331.676	1574.5	2447.7
128.21	871.099	1520.38	1548.22	0	624.575	329.842	412.496	753.784	2604	3456.39	1135.98	1810.33	2019	0	814.495	392.747	537.928	897.539	3100.62	4507.41
129.3	1332.78	2358.08	2389.56	0	581.808	269.616	219.848	734.522	3362.22	4523.99	1601.77	2587.64	2871.85	0	699.235	295.864	264.22	806.029	3689.54	5437.08
131.95	1511.8	2408.54	2898.88	0	663.945	282.952	480.557	468.332	3159.83	5555.18	2125.4	3091.73	4075.45	0	933.422	363.213	675.601	601.177	4056.12	7809.87
134.5	1708.33	3286.9	2971.08	0	639.001	244.441	410.346	847.164	4378.5	5728.76	2831.18	4973.75	4923.91	0	1059	369.89	680.058	1281.93	6625.58	9494.15
136.23	1701.26	3111.83	2894.33	0	597.666	399.512	494.348	989.71	4501.05	5687.6	2108.41	3521.29	3587	0	740.702	452.081	612.657	1119.94	5093.32	7048.77
141.24	446.605	756.604	977.708	0	210.111	137.369	152.83	364.987	1258.96	1787.25	544.772	842.679	1192.62	0	256.295	152.997	186.423	406.51	1402.19	2180.11
150.5	719.907	1375	1736.01	0	262.854	328.732	256.825	616.005	2319.73	2975.59	861.335	1502.1	2077.05	0	314.492	359.121	307.278	672.949	2534.17	3560.16
156.32	1144.94	1996.62	1959.01	0	279.854	289.804	312.945	427.602	2714.03	3696.75	1346.86	2144.57	2304.51	0	329.21	311.278	368.137	459.287	2915.13	4348.72
186.81	412.987	684.846	978.019	0	168.978	160.6	110.28	365.33	1210.78	1670.26	765.718	1159.38	1813.34	0	313.301	271.881	204.47	618.472	2049.74	3096.83
205.291	418.418	1153.89	1146.18	0	199.524	222.359	199.677	333.758	1710.01	1963.8	682.858	1719.44	1870.57	0	325.623	331.343	325.873	497.342	2548.13	3204.92
220.26	385.29	954.548	896.7	0	369.531	266.192	311.136	705.642	1926.38	1962.66	624.049	1411.67	1452.37	0	598.525	393.667	503.943	1043.56	2848.89	3178.89
242.34	384.056	877.835	899.661	0	186.508	149.781	120.989	430.81	1458.43	1591.21	796.077	1661.41	1864.83	0	386.596	283.479	250.787	815.358	2760.24	3298.29
265.61	91.8881	184.136	295.794	0	65.4982	48.4476	55.6321	183.495	416.078	508.812	89.5037	163.765	288.118	0	63.7986	43.0881	54.1886	163.195	370.049	495.609
280.5	222.929	762.972	793.545	0	170.17	174.321	146.319	280.441	1217.73	1332.96	397.544	1242.31	1415.11	0	303.46	283.837	260.927	456.627	1982.77	2377.04
301.46	230.385	582.519	743.263	0	127.415	78.0428	151.506	414.137	1074.7	1252.57	458.657	1058.88	1479.71	0	253.662	141.863	301.623	752.801	1953.54	2493.65
318.31	128.63	500.373	745.237	0	107.893	85.7573	58.1441	159.12	745.25	1039.9	169.403	601.692	981.461	0	142.092	103.122	76.5745	191.34	896.154	1369.53
339.21	96.9447	385.892	461.246	0	109.573	43.8426	180.533	210.714	640.449	848.297	168.246	611.49	800.486	0	190.163	69.4736	313.313	333.901	1014.86	1472.21
370.962	141.559	602.88	669.921	0	85.0564	44.0236	53.773	101.524	748.428	950.309	239.984	933.21	1135.72	0	144.196	68.145	91.1613	157.152	1158.51	1611.06
386.58	171.724	722.681	820.443	0	98.857	28.7231	117.802	61.5632	812.968	1208.83	222.581	855.277	1063.42	0	128.134	33.9932	152.69	72.8586	962.129	1566.83
398.19	97.0075	230.086	292.922	0	36.4454	0	51.7942	0	230.086	478.169	95.7725	207.409	289.192	0	35.9815	0	51.1348	0	207.409	472.081
420.51	66.5465	235.326	332.536	0	58.7756	59.3592	98.9351	78.0089	372.694	556.793	122.008	393.945	609.681	0	107.761	99.3698	181.39	130.59	623.905	1020.84
445.48	200.912	890.842	810.815	0	110.026	0	196.462	146.769	1037.61	1318.22	267.71	1083.83	1080.39	0	146.607	0	261.781	178.565	1262.4	1756.49
467.82	72.0174	361.262	364.815	0	67.2972	0	129.637	0	361.262	633.766	135.374	620.043	685.756	0	126.501	0	243.683	0	620.043	1191.31
483.11	0	220.68	370.516	0	58.8923	0	127.258	0	220.68	556.666	0	254.718	468.384	0	74.448	0	160.872	0	254.718	703.703
496.1	113.171	496.744	621.773	0	59.0509	0	205.148	167.69	664.434	999.143	213.102	854.055	1170.8	0	111.193	0	386.293	288.311	1142.37	1881.39
